# Supplementary material
Source: PubMed Central journal article supplement (PMC2820164)
Supplement: mmc1.pdf [file mmc1.pdf]

***AJHG*, Volume 86**

**Supplemental Data**

**The Distribution and Most Recent Common Ancestor  
of the 17q21 Inversion in Humans**

**Michael P. Donnelly, Peristera Paschou, Elena Grigorenko, David Gurwitz, Syed Qasim Mehdi, Sylvester L.B. Kajuna, Csaba Barta, Selemani Kungulilo, N.J. Karoma, Ru-Band Lu, Olga V. Zhukova, Jong-Jin Kim, David Comas, Marcello Siniscalco, Maria New, Peining Li, Hui Li, Vangelis G. Manolopoulos, William C. Speed, Haseena Rajeevan, Andrew J. Pakstis, Judith R. Kidd, and Kenneth K. Kidd**

**Figure S1. Eight H1 Polymorphic SNPs and Three Inversion-Marking SNPs**

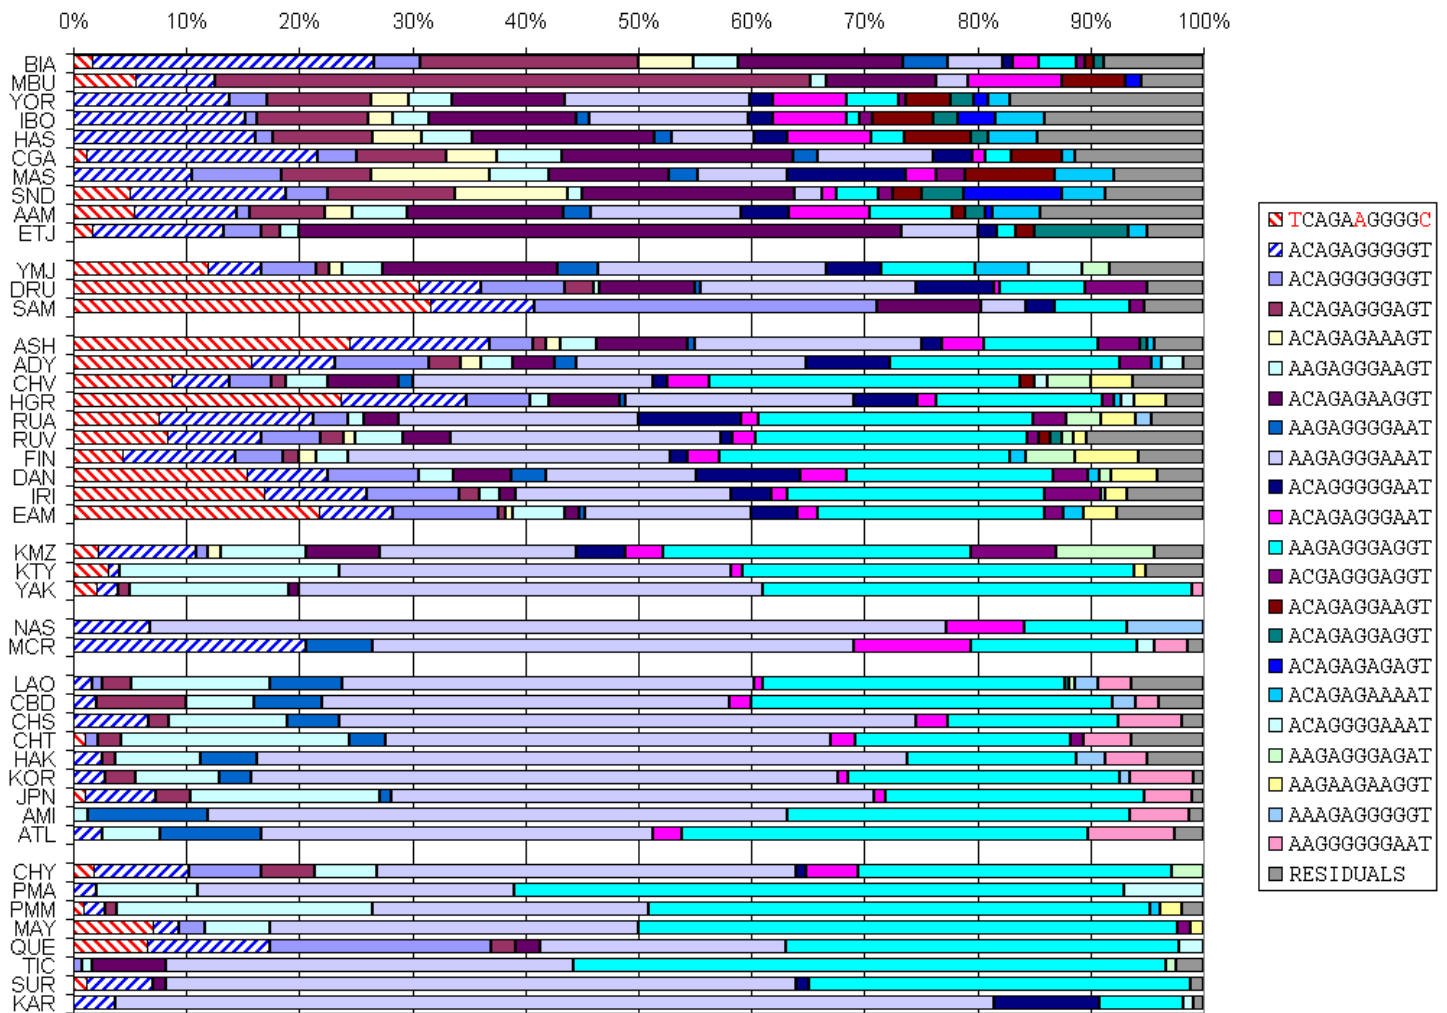

This figure shows the data from figure 4 divided into populations instead of regional averages. Like in figure 4 the haplotypes presented here are composed of eight H1 polymorphic SNPs that have a difference in frequency between Africa and Southwest Asia (rs242924, rs242940, rs171440, 173365, rs171443, rs4616318, rs962885, and rs242933), as well as three inversion marker SNPs (rs11079718, rs1396862, and rs1078830; the H2 alleles are red in the legend). The red striped bar represents the inversion. The inversion is most similar to the blue striped haplotype (differing at only the three inversion marker SNPs). The blue striped haplotype is more common in Africa compared to Southwest Asia. In Africa the blue-striped haplotype ranges in frequencies from 7% to 25%, whereas in Southwest Asia the frequencies range 4.7% to 9.2%.

Table S1. SNPs Typed

|        |            | UCSC                      | Computed | Number      |          |                      | H2                |          |          | Used in    | Typed | Populations         |
|--------|------------|---------------------------|----------|-------------|----------|----------------------|-------------------|----------|----------|------------|-------|---------------------|
| SNP    |            | Absolute                  | Distance | of          |          |                      | Allele            | Used in  | Used in  | MCRA       | in    | other than          |
| Number | dbSNP #    | Position(bp) <sup>a</sup> | in bp to | Populations | Assay    | SNP                  | Rare <sup>c</sup> | Figure 4 | Figure 5 | Haplotypes | NHP   | 46 Std <sup>d</sup> |
|        |            |                           | next SNP | Typed       | Type     | Lineage <sup>b</sup> |                   |          |          |            |       |                     |
| 1      | rs1724436  | 41,013,675                | 4,633    | 63 pops     | Illumina | H1                   |                   |          |          |            | *     | 1,2,3,4,5           |
| 2      | rs1724427  | 41,018,308                | 13,506   | 63 pops     | Illumina | H2                   |                   | *        |          |            | *     | 1,2,3,4,5           |
| 3      | rs16970596 | 41,031,814                | 38,642   | 63 pops     | Illumina | H1                   | *                 |          |          |            | *     | 1,2,3,4,5           |
| 4      | rs241039   | 41,070,456                | 11,011   | 62 pops     | Taqman   | inv marker           |                   |          |          | *          | *     | 2,3,4,5             |
| 5      | rs434428   | 41,081,467                | 2,692    | 49 pops     | Taqman   | inv marker           |                   |          |          | *          | *     | 6                   |
| 6      | rs417968   | 41,084,159                | 3,497    | 63 pops     | Illumina | H1                   |                   |          |          |            |       | 1,2,3,4,5           |
| 7      | rs1635302  | 41,087,656                | 3,605    | 63 pops     | Illumina | H1                   |                   |          |          |            | *     | 1,2,3,4,5           |
| 8      | rs241027   | 41,091,261                | 8,866    | 46 pops     | Taqman   | inv marker           |                   |          |          | *          | *     |                     |
| 9      | rs1635298  | 41,100,127                | 5,828    | 63 pops     | Illumina | H1                   |                   |          |          |            | *     | 1,2,3,4,5           |
| 10     | rs1630095  | 41,105,955                | 1,741    | 63 pops     | Illumina | H1                   |                   |          |          |            | *     | 1,2,3,4,5           |
| 11     | rs1635291  | 41,107,696                | 3,958    | 63 pops     | Illumina | H1                   |                   |          |          |            | *     | 1,2,3,4,5           |
| 12     | rs1724400  | 41,111,654                | 5,985    | 63 pops     | Illumina | H1                   |                   |          |          |            | *     | 1,2,3,4,5           |
| 13     | rs2049515  | 41,117,639                | 3,601    | 49 pops     | Taqman   | inv marker           |                   |          |          | *          |       | 6                   |
| 14     | rs16941049 | 41,121,240                | 2,316    | 63 pops     | Illumina | H1                   |                   |          |          |            | *     | 1,2,3,4,5           |
| 15     | rs7215239  | 41,123,556                | 5,351    | 63 pops     | Illumina | H1                   |                   |          |          |            | *     | 1,2,3,4,5           |
| 16     | rs10491144 | 41,128,907                | 4,189    | 49 pops     | Taqman   | inv marker           |                   |          |          | *          | *     | 6                   |
| 17     | rs1724422  | 41,133,096                | 3,792    | 63 pops     | Illumina | H1                   |                   |          |          |            | *     | 1,2,3,4,5           |
| 18     | rs968028   | 41,136,888                | 642      | 46 pops     | Taqman   | H1                   |                   |          |          |            | *     |                     |
| 19     | rs1724425  | 41,137,530                | 1,593    | 63 pops     | Illumina | H1                   |                   |          |          |            | *     | 1,2,3,4,5           |
| 20     | rs1526123  | 41,139,123                | 888      | 63 pops     | Illumina | H1                   |                   |          |          |            | *     | 1,2,3,4,5           |
| 21     | rs9912362  | 41,140,011                | 2,008    | 63 pops     | Illumina | H1                   |                   |          |          |            |       | 1,2,3,4,5           |
| 22     | rs8073838  | 41,142,019                | 2,560    | 63 pops     | Illumina | H1                   |                   |          |          |            | *     | 1,2,3,4,5           |
| 23     | rs1880748  | 41,144,579                | 7,745    | 63 pops     | Illumina | H1                   |                   |          |          |            | *     | 1,2,3,4,5           |
| 24     | rs1880750  | 41,152,324                | 6,430    | 46 pops     | Taqman   | H1                   | *                 |          |          |            | *     |                     |
| 25     | rs10514879 | 41,158,754                | 3,954    | 63 pops     | Illumina | inv marker           |                   |          |          |            | *     | 1,2,3,4,5           |
| 26     | rs2902662  | 41,162,708                | 1,002    | 46 pops     | Taqman   | inv marker           |                   |          |          | *          | *     |                     |
| 27     | rs1880753  | 41,167,031                | 1,637    | 63 pops     | Illumina | H1                   |                   |          |          |            | *     | 1,2,3,4,5           |
| 28     | rs12938476 | 41,168,668                | 13,769   | 63 pops     | Illumina | H1                   |                   |          |          |            | *     | 1,2,3,4,5           |
| 29     | rs1880756  | 41,182,437                | 13,286   | 63 pops     | Illumina | H1                   |                   |          |          |            | *     | 1,2,3,4,5           |
| 30     | rs11079718 | 41,195,723                | 6,771    | 46 pops     | Taqman   | inv marker           |                   |          | *        |            | *     |                     |
| 31     | rs6503449  | 41,202,494                | 8,428    | 63 pops     | Illumina | H1                   |                   |          |          |            | *     | 1,2,3,4,5           |
| 32     | rs4074461  | 41,210,922                | 72       | 63 pops     | Illumina | H1                   |                   |          |          |            | *     | 1,2,3,4,5           |
| 33     | rs4074462  | 41,210,994                | 4,174    | 63 pops     | Illumina | H1                   | *                 |          |          |            | *     | 1,2,3,4,5           |
| 34     | rs12942300 | 41,215,168                | 10,745   | 46 pops     | Taqman   | H1                   |                   |          |          |            | *     |                     |
| 35     | rs7209436  | 41,225,913                | 6,878    | 46 pops     | Taqman   | H1                   |                   |          |          |            | *     |                     |
| 36     | rs4792887  | 41,232,791                | 3,027    | 63 pops     | Illumina | H1                   |                   |          |          |            | *     | 1,2,3,4,5           |
| 37     | rs110402   | 41,235,818                | 5,329    | 46 pops     | Taqman   | botH                 |                   | *        |          |            | *     |                     |
| 38     | rs242924   | 41,241,147                | 7,233    | 63 pops     | Illumina | H1                   |                   |          | *        |            | *     | 1,2,3,4,5           |
| 39     | rs242940   | 41,248,380                | 887      | 63 pops     | Illumina | H1                   |                   |          | *        |            | *     | 1,2,3,4,5           |

|        |               | UCSC                      | Computed Distance | Number of   |          |                      | H2                |          |          | Used in    | Typed | Populations         |
|--------|---------------|---------------------------|-------------------|-------------|----------|----------------------|-------------------|----------|----------|------------|-------|---------------------|
| SNP    |               | Absolute                  | in bp to          | Populations | Assay    | SNP                  | Allele            | Used in  | Used in  | MCRA       | in    | other than          |
| Number | dbSNP #       | Position(bp) <sup>a</sup> | next SNP          | Typed       | Type     | Lineage <sup>b</sup> | Rare <sup>c</sup> | Figure 4 | Figure 5 | Haplotypes | NHP   | 46 Std <sup>d</sup> |
| 40     | rs171440      | 41,249,267                | 4,882             | 63 pops     | Illumina | H1                   |                   |          | *        |            | *     | 1,2,3,4,5           |
| 41     | rs242937      | 41,254,149                | 2,706             | 63 pops     | Illumina | botH                 |                   | *        |          |            | *     | 1,2,3,4,5           |
| 42     | rs173365      | 41,256,855                | 1,923             | 46 pops     | Tagman   | H1                   |                   |          | *        |            | *     |                     |
| 43     | rs1396862     | 41,258,778                | 10,547            | 46 pops     | Tagman   | inv marker           |                   |          | *        |            | *     |                     |
| 44     | rs242948      | 41,269,325                | 10,353            | 63 pops     | Illumina | botH                 |                   | *        |          |            | *     | 1,2,3,4,5           |
| 45     | rs171443      | 41,279,678                | 4,912             | 46 pops     | Tagman   | H1                   |                   |          | *        |            | *     |                     |
| 46     | rs4616318     | 41,284,590                | 6,830             | 46 pops     | Tagman   | H1                   |                   |          | *        |            | *     |                     |
| 47     | rs962885      | 41,291,420                | 2,839             | 63 pops     | Illumina | H1                   |                   |          | *        |            | *     | 1,2,3,4,5           |
| 48     | rs242933      | 41,294,259                | 7,642             | 63 pops     | Illumina | H1                   |                   |          | *        |            | *     | 1,2,3,4,5           |
| 49     | rs1078830     | 41,301,901                | 1,700             | 46 pops     | Tagman   | inv marker           |                   | *        | *        |            | *     |                     |
| 50     | rs916793      | 41,310,477                | 9,619             | 55 pops     | Tagman   | inv marker           |                   | *        |          |            | *     | 1,2,3,4,            |
| 51     | rs4792891     | 41,329,294                | 6,474             | 63 pops     | Illumina | H1                   |                   |          |          |            | *     | 1,2,3,4,5           |
| 52     | rs930119      | 41,335,768                | 5,191             | 63 pops     | Illumina | H1                   |                   |          |          |            | *     | 1,2,3,4,5           |
| 53     | rs2280004     | 41,340,959                | 8,245             | 63 pops     | Illumina | H1                   |                   |          |          |            | *     | 1,2,3,4,5           |
| 54     | rs3785880     | 41,349,204                | 3,185             | 63 pops     | Illumina | H1                   |                   |          |          |            | *     | 1,2,3,4,5           |
| 55     | rs767057      | 41,354,650                | 6,102             | 46 pops     | Tagman   | H1                   |                   |          |          |            | *     |                     |
| 56     | rs16940742    | 41,360,752                | 14,821            | 63 pops     | Illumina | H1                   |                   |          |          |            | *     | 1,2,3,4,5           |
| 57     | rs242557      | 41,375,573                | 7,026             | 46 pops     | Tagman   | H1                   |                   |          |          |            | *     |                     |
| 58     | rs242562      | 41,382,599                | 4,652             | 46 pops     | Tagman   | H1                   |                   |          |          |            | *     |                     |
| 59     | rs878917      | 41,387,251                | 8,276             | 63 pops     | Illumina | H1                   |                   |          |          |            | *     | 1,2,3,4,5           |
| 60     | rs17650901    | 41,395,527                | 9,638             | 49 pops     | Tagman   | inv marker           |                   | *        |          |            | *     | 6                   |
| 61     | E_TAUBSAHI_10 | 41,405,165                | 1,499             | 46 pops     | Tagman   | H1                   | *                 |          |          |            | *     |                     |
| 62     | rs9896485     | 41,406,664                | 1,018             | 63 pops     | Illumina | H1                   |                   |          |          |            | *     | 1,2,3,4,5           |
| 63     | rs1800547     | 41,407,682                | 78                | 50 pops     | Tagman   | H1                   | *                 |          |          |            | *     | 2                   |
| 64     | rs17651213    | 41,407,760                | 1,524             | 46 pops     | Tagman   | inv marker           |                   |          |          |            | *     |                     |
| 65     | rs2435214     | 41,424,176                | 5,549             | 42 pops     | Tagman   | H1                   |                   |          |          |            | *     |                     |
| 66     | rs1052553     | 41,429,725                | 85                | 46 pops     | Tagman   | inv marker           |                   |          |          |            | *     |                     |
| 67     | rs1991556     | 41,439,239                | 4,098             | 46 pops     | Tagman   | H1                   |                   |          |          |            | *     |                     |
| 68     | C_2560324_10  | 41,443,337                | 4,226             | 46 pops     | Tagman   | H1                   |                   |          |          |            | *     |                     |
| 69     | E_TAUIVS11_10 | 41,447,563                | 7,079             | 46 pops     | Tagman   | inv marker           |                   |          |          |            | *     |                     |
| 70     | rs916896      | 41,454,642                | 2,766             | 63 pops     | Illumina | H1                   |                   |          |          |            | *     | 1,2,3,4,5           |
| 71     | rs9468        | 41,457,408                | 3,834             | 63 pops     | Tagman   | inv marker           |                   |          |          |            | *     | 1,2,3,4,5           |
| 72     | rs7521        | 41,461,242                | 4,448             | 46 pops     | Tagman   | H1                   |                   |          |          |            | *     |                     |
| 73     | rs1078997     | 41,465,690                | 7,000             | 63 pops     | Illumina | H1                   |                   |          |          |            | *     | 1,2,3,4,5           |
| 74     | C_2560314_10  | 41,472,690                | 3,146             | 46 pops     | Tagman   | H1                   |                   |          |          |            | *     |                     |
| 75     | rs10514899    | 41,475,836                | 8,141             | 63 pops     | Illumina | H1                   |                   |          |          |            | *     | 1,2,3,4,5           |
| 76     | rs12150447    | 41,483,977                | 3,164             | 59 pops     | Tagman   | inv marker           |                   |          |          |            | *     | 1,3,4,5             |
| 77     | rs4792827     | 41,487,141                | 4,725             | 63 pops     | Illumina | H1                   |                   |          |          |            | *     | 1,2,3,4,5           |
| 78     | rs933317      | 41,491,866                | 5,301             | 46 pops     | Tagman   | H1                   |                   |          |          |            | *     |                     |
| 79     | rs2838        | 41,497,167                | 2,869             | 63 pops     | Tagman   | inv marker           |                   |          |          |            | *     | 1,2,3,4,5           |

| SNP    |                       | UCSC                               | Computed Distance | Number of         | Assay    | SNP                  | H2                       | Used in  | Used in  | Used in         | Typed in | Populations other than |
|--------|-----------------------|------------------------------------|-------------------|-------------------|----------|----------------------|--------------------------|----------|----------|-----------------|----------|------------------------|
| Number | dbSNP #               | Absolute Position(bp) <sup>a</sup> | in bp to next SNP | Populations Typed | Type     | Lineage <sup>b</sup> | Allele Rare <sup>c</sup> | Figure 4 | Figure 5 | MCRA Haplotypes | NHP      | 46 Std <sup>d</sup>    |
| 80     | rs2301732             | 41,500,036                         | 11,514            | 63 pops           | Illumina | H1                   |                          |          |          |                 | *        | 1,2,3,4,5              |
| 81     | rs2066899             | 41,511,550                         | 33,300            | 46 pops           | Taqman   | H1                   |                          |          |          |                 | *        |                        |
| 82     | rs7225002             | 41,544,850                         | 7,082             | 63 pops           | Illumina | H1                   |                          |          |          |                 | *        | 1,2,3,4,5              |
| 83     | rs1468241             | 41,551,932                         | 10,511            | 46 pops           | Taqman   | inv marker           |                          |          |          |                 | *        |                        |
| 84     | rs4792831             | 41,562,443                         | 1,646             | 63 pops           | Illumina | H1                   |                          |          |          |                 | *        | 1,2,3,4,5              |
| 85     | rs6503457             | 41,564,089                         | 12,142            | 63 pops           | Illumina | H1                   |                          |          |          |                 | *        | 1,2,3,4,5              |
| 86     | rs1528075             | 41,576,231                         | 7,169             | 46 pops           | Taqman   | inv marker           |                          |          |          |                 | *        |                        |
| 87     | rs2696578             | 41,583,400                         | 9,102             | 63 pops           | Illumina | H1                   |                          |          |          |                 | *        | 1,2,3,4,5              |
| 88     | rs1528072             | 41,592,502                         | 11,774            | 58 pops           | Taqman   | inv marker           |                          |          |          |                 | *        | 2,5                    |
| 89     | rs2240758             | 41,604,276                         | 11,191            | 63 pops           | Illumina | H1                   |                          |          |          |                 | *        | 1,2,3,4,5              |
| 90     | rs2240756             | 41,615,467                         | 404,011           | 63 pops           | Illumina | H1                   |                          |          |          |                 | *        | 1,2,3,4,5              |
|        | total coverage bp/snp | 601,792<br>6686.577778             |                   |                   |          |                      |                          |          |          |                 |          |                        |

<sup>a</sup> NCBI Build 36.1

<sup>b</sup> Whether the SNP is polymorphic on H1 and/or H2 or is an inversion marker

<sup>c</sup> The allele that is found on the H2 lineage is rare on the H1 lineage

<sup>d</sup> 1=ZAR 2=SOM, NMK, HAZ, MOH 3=GRK, TOS 4=SRD, RMJ 5=LIS, KWT, THT, KCH, PNG, SMN, MLY, GHB 6= CAT, SPB, PLA

**Table S2. Non-Human Primate Alleles of Inversion Marking SNPs**

|            | NHP Consensus | Gorilla gorilla | Hylobates | Pan paniscus | Pan troglodytes | Pongo pygmaeus |
|------------|---------------|-----------------|-----------|--------------|-----------------|----------------|
| H1 alleles | 13            | 11              | 10        | 11           | 11              | 8              |
| H2 alleles | 7             | 6               | 3         | 5            | 6               | 9              |
| unknown    | 1             | 4               | 8         | 5            | 4               | 4              |

**Table S3. Non-Human Primate Alleles of SNPs Polymorphic only on H1**

|               | NHP Consensus | Gorilla gorilla | Hylobates | Pan paniscus | Pan troglodytes | Pongo pygmaeus |
|---------------|---------------|-----------------|-----------|--------------|-----------------|----------------|
| H2 Allele     | 55            | 54              | 39        | 56           | 57              | 38             |
| non-H2 Allele | 4             | 5               | 7         | 4            | 4               | 6              |
| unknown       | 3             | 3               | 16        | 2            | 1               | 18             |

**Table S4. STRPS Primers**

| STRP   | forward primer               | reverse primer               |
|--------|------------------------------|------------------------------|
| MAPT07 | TCAGATTCGGTTTCGGGGGTCGTTATCG | GCTGGAGGGTCTTCACCACCAGATTCGC |
| MAPT08 | CAATGAGCCAAGATCACACCTACTG    | GGGTCCTATCATTCTCTCTGCTATCA   |
| MAPT09 | TTCTTCTTGCCAATAGCAAGGATAC    | CAGTATATACCCAGAAAAGTGCAATGTG |
| MAPT14 | CTCACAAATGTTCTCTGTCTCTTCTGTC | GATGCATCTAATTTAAGGCATCTTATGA |

**Table S5. Relationships between HGDP H2 Individuals**

| Population  | Ind. 1    | Ind. 1 Genotype | Ind. 2    | Ind. 2 Genotype | Relationship <sup>a</sup> |
|-------------|-----------|-----------------|-----------|-----------------|---------------------------|
| Mandenka    | HGDP00914 | Heterozygous    | HGDP00919 | Heterozygous    | HS or AV                  |
| Palestinian | HGDP00681 | H1 Homozygous   | HGDP00684 | Heterozygous    | HS or AV                  |
| Palestinian | HGDP00682 | H1 Homozygous   | HGDP00743 | Heterozygous    | HS or AV                  |
| Palestinian | HGDP00723 | H2 Homozygous   | HGDP00743 | Heterozygous    | HS or AV                  |
| Bedouin     | HGDP00616 | Heterozygous    | HGDP00633 | Heterozygous    | PO                        |
| Bedouin     | HGDP00617 | H2 Homozygous   | HGDP00635 | H2 Homozygous   | HS or AV                  |
| Orcadian    | HGDP00794 | Heterozygous    | HGDP00801 | Heterozygous    | PO                        |
| Balochi     | HGDP00082 | Heterozygous    | HGDP00084 | H2 Homozygous   | FS                        |
| Kalash      | HGDP00321 | Heterozygous    | HGDP00326 | H1 Homozygous   | HS, AV, CO, or GG         |

<sup>a</sup>HS- Half Sibling, AV- Avuncular, PO- Parent-Offspring, FS- Full Sibling, CO- Cousin, GG- Grandparent-Grandchild
